# Supplementary material for: Prenatal Exposure to Acetaminophen and Childhood Asthmatic Symptoms in a Population-Based Cohort in Los Angeles, California
Source: MDPI journal article supplement (doi:10.3390/ijerph181910107), 2021-09-26
Supplement: s1 [file s1]

**Title:** Prenatal exposure to acetaminophen and childhood asthmatic symptoms in a population-based cohort in Los Angeles, California.

**Authors and Affiliations** Zeyan Liew, PhD, MPH; Yuying Yuan, MPH; Qi Meng, MS; Ondine S. von Ehrenstein, PhD; Xin Cui, MD, PhD; Marie E.S. Flores, MD, PhD, MPH; Beate Ritz, MD, PhD

**Correspondence** Address correspondence to Zeyan Liew, Department of Environmental Health Sciences, Yale School of Public Health. Full address: 60 College Street, New Haven CT 06510. Email: zeyan.liew@yale.edu

**Table S1. Risk ratio (RR) and 95% confidence interval (CI) for asthmatic outcomes in early childhood according to maternal prenatal acetaminophen use.**

|                  | Never use<br>during<br>pregnancy<br>(N=808) | Ever use<br>during<br>pregnancy<br>(N=393) | RR (95% CI)          |                      |                      |
|------------------|---------------------------------------------|--------------------------------------------|----------------------|----------------------|----------------------|
|                  |                                             |                                            | Model A <sup>a</sup> | Model B <sup>b</sup> | Model C <sup>c</sup> |
| Asthma diagnosis | 71                                          | 47                                         | 1.39 (0.96, 2.00)    | 1.35 (0.93, 1.95)    | 1.38 (0.96, 1.98)    |
| Wheezing ever    | 186                                         | 118                                        | 1.25 (1.01, 1.54)    | 1.22 (0.99, 1.51)    | 1.25 (1.01, 1.54)    |
| Dry cough ever   | 147                                         | 96                                         | 1.35 (1.06, 1.73)    | 1.32 (1.03, 1.69)    | 1.35 (1.05, 1.73)    |

a. Model A: adjusted for maternal age, parity, maternal race/ethnicity, household income, smoking, maternal high fever, and aspirin or ibuprofen during pregnancy.

b. Model B: adjusted for all in Model A and pre-pregnancy BMI, use of antibiotics, maternal alcohol intake during pregnancy.

c. Model C: adjusted for all in Model A and exposures to carbon monoxide (CO), nitrogen dioxide (NO<sub>2</sub>), PM10 and PM2.5 during pregnancy.

**Table S2. Risk ratio (RR) and 95% confidence interval (CI) for asthmatic outcomes in early childhood according to maternal prenatal acetaminophen use among Hispanic/Latinx, stratified by maternal birthplace.**

|                                     | Acetaminophen use during pregnancy | No. of all children | Asthma diagnosis |                          | Wheezing |                          | Dry cough |                          |
|-------------------------------------|------------------------------------|---------------------|------------------|--------------------------|----------|--------------------------|-----------|--------------------------|
|                                     |                                    |                     | N                | RR <sup>a</sup> (95% CI) | N        | RR <sup>a</sup> (95% CI) | N         | RR <sup>a</sup> (95% CI) |
| <b>U.S born Hispanic/Latinx</b>     | Never                              | 154                 | 16               | Ref                      | 46       | Ref                      | 27        | Ref                      |
|                                     | Ever                               | 74                  | 9                | 0.95 (0.42, 2.16)        | 21       | 0.96 (0.60, 1.53)        | 16        | 1.18 (0.63, 2.24)        |
| <b>Foreign born Hispanic/Latinx</b> | Never                              | 361                 | 34               | Ref                      | 72       | Ref                      | 66        | Ref                      |
|                                     | Ever                               | 129                 | 8                | 0.68 (0.30, 1.54)        | 29       | 1.11 (0.75, 1.66)        | 26        | 1.17 (0.76, 1.82)        |

a. Adjusted for maternal age, parity, household income, smoking, maternal high fever, and aspirin or ibuprofen during pregnancy.

**Table S3. Risk ratio (RR) and 95% confidence interval (CI) for asthmatic outcomes in early childhood according to maternal acetaminophen use in each pregnancy trimester.**

|                            |                  | First trimester exposure |     |                         |                          | Second trimester exposure |     |                          |                          | Third trimester exposure |     |                          |                          |
|----------------------------|------------------|--------------------------|-----|-------------------------|--------------------------|---------------------------|-----|--------------------------|--------------------------|--------------------------|-----|--------------------------|--------------------------|
|                            |                  | No                       | Yes | RR <sup>a</sup> (95%CI) | RR <sup>b</sup> (95% CI) | No                        | Yes | RR <sup>a</sup> (95% CI) | RR <sup>b</sup> (95% CI) | No                       | Yes | RR <sup>a</sup> (95% CI) | RR <sup>b</sup> (95% CI) |
| <b>Total population</b>    | Asthma diagnosis | 103                      | 15  | 0.82 (0.48, 1.41)       | 0.61 (0.31, 1.20)        | 88                        | 30  | 1.33 (0.88, 2.02)        | 1.42 (0.84, 2.38)        | 91                       | 27  | 1.25 (0.82, 1.91)        | 1.25 (0.74, 2.12)        |
|                            | Wheezing         | 249                      | 55  | 1.19 (0.90, 1.56)       | 1.10 (0.79, 1.54)        | 232                       | 72  | 1.11 (0.87, 1.41)        | 0.97 (0.71, 1.33)        | 231                      | 73  | 1.23 (0.97, 1.56)        | 1.20 (0.90, 1.62)        |
|                            | Dry cough        | 203                      | 40  | 1.13 (0.81, 1.57)       | 0.91 (0.61, 1.34)        | 179                       | 64  | 1.34 (1.02, 1.75)        | 1.26 (0.90, 1.76)        | 183                      | 60  | 1.32 (1.00, 1.74)        | 1.22 (0.87, 1.71)        |
| <b>White, not Hispanic</b> | Asthma diagnosis | 18                       | 5   | 0.70 (0.26, 1.85)       | 0.48 (0.12, 1.93)        | 13                        | 10  | 1.20 (0.55, 2.63)        | 1.33 (0.41, 4.39)        | 14                       | 9   | 1.23 (0.53, 2.84)        | 1.40 (0.42, 4.61)        |
|                            | Wheezing         | 54                       | 25  | 0.99 (0.64, 1.52)       | 0.86 (0.50, 1.48)        | 48                        | 31  | 1.08 (0.73, 1.60)        | 0.97 (0.51, 1.86)        | 48                       | 31  | 1.18 (0.79, 1.77)        | 1.30 (0.70, 2.43)        |
|                            | Dry cough        | 44                       | 17  | 0.84 (0.51, 1.37)       | 0.66 (0.35, 1.24)        | 37                        | 24  | 1.14 (0.73, 1.79)        | 1.27 (0.66, 2.45)        | 39                       | 22  | 1.12 (0.70, 1.79)        | 1.18 (0.61, 2.30)        |
| <b>Hispanic/Latinx</b>     | Asthma diagnosis | 62                       | 5   | 0.50 (0.20, 1.23)       | 0.53 (0.19, 1.47)        | 56                        | 11  | 0.89 (0.45, 1.75)        | 1.17 (0.57, 2.42)        | 59                       | 8   | 0.64 (0.30, 1.35)        | 0.70 (0.31, 1.58)        |
|                            | Wheezing         | 146                      | 22  | 1.34 (0.90, 1.97)       | 1.41 (0.91, 2.19)        | 139                       | 29  | 1.00 (0.69, 1.46)        | 0.89 (0.58, 1.36)        | 140                      | 28  | 1.05 (0.73, 1.52)        | 1.00 (0.66, 1.51)        |
|                            | Dry cough        | 120                      | 15  | 1.20 (0.72, 1.99)       | 1.16 (0.65, 2.08)        | 111                       | 24  | 1.02 (0.66, 1.59)        | 0.88 (0.53, 1.46)        | 110                      | 25  | 1.25 (0.83, 1.89)        | 1.26 (0.81, 1.97)        |
| <b>Others <sup>c</sup></b> | Asthma diagnosis | 23                       | 5   | 1.87 (0.79, 4.42)       | 0.86 (0.24, 3.06)        | 19                        | 9   | 2.76 (1.36, 5.58)        | 2.00 (0.76, 5.26)        | 18                       | 10  | 2.93 (1.44, 5.98)        | 2.33 (0.83, 6.50)        |
|                            | Wheezing         | 47                       | 7   | 1.24 (0.65, 2.35)       | 0.82 (0.35, 1.91)        | 42                        | 12  | 1.42 (0.85, 2.39)        | 1.14 (0.61, 2.13)        | 40                       | 14  | 1.88 (1.18, 2.99)        | 1.91 (1.07, 3.41)        |
|                            | Dry cough        | 38                       | 8   | 1.49 (0.76, 2.95)       | 0.86 (0.40, 1.88)        | 30                        | 16  | 2.71 (1.68, 4.35)        | 2.44 (1.51, 3.93)        | 33                       | 13  | 2.03 (1.16, 3.55)        | 1.49 (0.78, 2.85)        |

a. Model A: adjusted for maternal age, parity, maternal race/ethnicity, household income, smoking, maternal high fever, and aspirin or ibuprofen during pregnancy.

b. Model B: all in Model A and mutually adjusted for first, second, and third trimester exposure in the same model.

c. Includes Black/African American, Asian/Pacific Islander, American Indian, Indian (excluding American Indian, Eskimo and Aleut), Filipino, Hawaiian, Guamanian, Samoan, Eskimo, Aleut, and other specified races.

**Table S4. Risk ratio (RR) and 95% confidence interval (CI) for asthmatic outcomes in early childhood according to maternal prenatal acetaminophen use, stratified by child's sex.**

|                         | Child's sex | Acetaminophen use during pregnancy |              | RR <sup>a</sup> (95% CI) | Interaction p-value <sup>a</sup> |
|-------------------------|-------------|------------------------------------|--------------|--------------------------|----------------------------------|
|                         |             | Never use (N)                      | Ever use (N) |                          |                                  |
| <b>Asthma diagnosis</b> | Male        | 43                                 | 33           | 1.59 (1.03, 2.45)        | ref                              |
|                         | Female      | 28                                 | 14           | 1.08 (0.55, 2.12)        | 0.34                             |
| <b>Wheezing</b>         | Male        | 110                                | 74           | 1.35 (1.04, 1.75)        | ref                              |
|                         | Female      | 76                                 | 44           | 1.13 (0.79, 1.60)        | 0.35                             |
| <b>Dry cough</b>        | Male        | 87                                 | 53           | 1.24 (0.90, 1.71)        | ref                              |
|                         | Female      | 60                                 | 43           | 1.48 (1.01, 2.15)        | 0.75                             |

a. Adjusted for maternal age, parity, maternal race/ethnicity, household income, smoking, maternal high fever, and aspirin or ibuprofen during pregnancy.
